# Supplementary material for: Concordance between the updated Elecsys cerebrospinal fluid immunoassays and amyloid positron emission tomography for Alzheimer’s disease assessment: findings from the Apollo study
Source: publisher site journal article supplement (doi:10.1515/cclm-2024-1476), 2025-03-11
Supplement: Supplementary file 1 [file j_cclm-2024-1476_suppl_001.docx]

# Supplementary material

## Eligibility criteria

Individuals with subjective cognitive decline (SCD) or mild cognitive impairment (MCI) (and Mini-Mental State Examination score ≥24) were recruited for cohorts C and C2 of the Swedish BioFINDER-2 study (NCT03174938) based on previously described eligibility criteria [1]. From this population, individuals were considered eligible for the Apollo study if they (1) belonged to cohort C or C2 (individuals with and without an incipient neurocognitive disorder, respectively) and had a clinical diagnosis of SCD/MCI at their intended visit; (2) underwent a detailed clinical assessment (including cognitive testing), lumbar puncture to collect cerebrospinal fluid (CSF) samples, and amyloid positron emission tomography (PET) scans after the initiation of the Apollo study up to the point when at least the minimum sample size requirement was fulfilled; (3) had valid measurements in fresh CSF samples that were collected according to the new routine-use pre-analytical protocol [2] and measured with the Elecsys® assays; (4) provided signed informed consent for their participation in the BioFINDER-2 study.

## Elecsys CSF Aβ42/Aβ40 ratio cutoff determination

The original cutoff for the β-amyloid(1–42) (Aβ42)/ β-amyloid(1–40) (Aβ40) ratio of <0.058 (positive percent agreement = 94.0% and negative percent agreement = 83.9% in BioFINDER-1) was determined by averaging three cutoff values. These values were derived from three independent datasets from the BioFINDER-1, Alzheimer’s Disease Neuroimaging Initiative (ADNI), and University of California San Francisco cohorts through the optimization of the Youden Index. Before averaging, authors cross-validated cutoffs by comparing accuracies in all three cohorts [3]. The Aβ42/Aβ40 cutoff was then adjusted for the new routine-use pre-analytical procedure and the updated Aβ42 Gen2 immunoassay based on the results of a previous bridging study [4]. Since Aβ40 is also slightly affected by the pre-analytical procedure, an adjustment factor has been determined for the Aβ42/Aβ40 ratio. The overall mean percentage difference between the CSF Aβ42/Aβ40 ratios measured in samples collected using the BioFINDER-1 protocol for frozen samples, and measured using the first-generation Elecsys Aβ42 CSF immunoassay (X), versus the corresponding ratios obtained in samples prepared according to the new routine-use pre-analytical procedure and measured using the updated second-generation Elecsys β-Amyloid (1–42) CSF (Aβ42 Gen2) immunoassay (Y), was calculated as: (Y – X)/X * 100% = –9.69% (95% confidence interval, –11.67; –7.70, n = 25, Wilcoxon signed-rank test p<0.0001). Consequently, a cutoff adjustment factor of 1 – 0.0969 = 0.9031 was applied to the original cutoff for Aβ42/Aβ40 and the newly adjusted cutoff value for the Elecsys Aβ42/Aβ40 assay, rounded to three significant digits, was calculated as 0.058 * 0.9031 = 0.052.

## Expert amyloid PET visual read process

For each individual enrolled in the Apollo study, an expert visual read of the 18F-flutemetamol amyloid PET scan was obtained. The visual read was conducted by three expert readers (via a majority vote system), and coordinated by Invicro, LLC, Boston, USA. The readers were nuclear medicine physicians or qualified radiologists who routinely perform visual assessment and interpretation of nuclear medicine procedures. All readings were performed independently and 10% of scans were re-read for intra-rater reliability.

# References

1. THE SWEDISH BioFINDER STUDY. Population & study design [Online]. <https://biofinder.se/two/population-study-design/> [Accessed 27 Nov 2024].
2. Hansson O, Rutz S, Zetterberg H, Bauer E, Hähl T, Manuilova E, et al. Pre-analytical protocol for measuring Alzheimer's disease biomarkers in fresh CSF. Alzheimers Dement (Amst) 2020;12:e12137. Erratum in: Alzheimers Dement (Amst). 2021;13(1):e76.
3. Leuzy A, Mattsson-Carlgren N, Cullen NC, Stomrud E, Palmqvist S, La Joie R, et al. Robustness of CSF Aβ42/40 and Aβ42/P-tau181 measured using fully automated immunoassays to detect AD-related outcomes. Alzheimers Dement 2023;19:2994–3004.
4. Blennow K, Stomrud E, Zetterberg H, Borlinghaus N, Corradini V, Manuilova E, et al. Second-generation Elecsys cerebrospinal fluid immunoassays aid diagnosis of early Alzheimer's disease. Clin Chem Lab Med 2023;61:234–44.

**Supplementary Table 1:** Demographic and clinical characteristics of individuals with discordant observations between PET visual read status and CSF biomarker measurement results for pTau/Aβ42, tTau/Aβ42, Aβ42/Aβ40 and Aβ42.

|  | **PET−/CSF+** | **PET+/CSF−** |
| --- | --- | --- |
| pTau/Aβ42 Age, mean years (min–max) MMSE score, mean (min–max)  Sex, n (%) Female Male  *APOE* status, n (%) Carrier Non-carrier | n=6 74.3 (64.0–85.0) 28.3 (24.0–30.0)  1 (16.7) 5 (83.3)  5 (83.3) 1 (16.7) | n=8 68.5 (55.0–79.0) 29.4 (28.0–30.0)  4 (50.0) 4 (50.0)  5 (62.5) 3 (37.5) |
| tTau/Aβ42 Age, mean years (min–max) MMSE score, mean (min–max)  Sex, n (%) Female Male  *APOE* status, n (%) Carrier Non-carrier | n=5 73.8 (64.0–85.0) 28.0 (24.0–30.0)  1 (20.0) 4 (80.0)  4 (80.0) 1 (20.0) | n=9 69.3 (55.0–79.0) 29.2 (28.0–30.0)  4 (44.4) 5 (55.6)  6 (66.7) 3 (33.3) |
| Aβ42/Aβ40 Age, mean years (min–max) MMSE score, mean (min–max)  Sex, n (%) Female Male  *APOE* status, n (%) Carrier Non-carrier | n=9 68.8 (51.0–85.0) 28.8 (24.0–30.0)  3 (33.3) 6 (66.7)  8 (88.9) 1 (11.1) | n=2 60.0 (55.0–65.0) 29.5 (29.0–30.0)  1 (50.0) 1 (50.0)  1 (50.0) 1 (50.0) |
| Aβ42 Age, mean years (min–max) MMSE score, mean (min–max)  Sex, n (%) Female Male  *APOE* status, n (%) Carrier Non-carrier | n=18 67.9 (51.0–85.0) 28.9 (24.0–30.0)  5 (27.8) 13 (72.2)  11 (61.1) 7 (38.9) | n=1 77.0 (77.0–77.0) 30.0 (30.0–30.0)  1 (100.0) 0 (0.0)  0 (0.0) 1 (100.0) |

+, positive; –, negative; Aβ40, β-amyloid(1–40); Aβ42, β-amyloid(1–42); *APOE*, apolipoprotein E; CSF, cerebrospinal fluid; MMSE, Mini-Mental State Examination; PET, positron emission tomography; pTau, phosphorylated tau; tTau, total tau.

**Supplementary Table 2:** Numeric values of pTau/Aβ42, tTau/Aβ42, Aβ42/Aβ40 and Aβ42 of individuals with discordant observations between PET visual read status and CSF biomarker measurement results.

| **CSF biomarker/status** | **PET results per readera** | **Numeric value of CSF biomarker** |
| --- | --- | --- |
| pTau/Aβ42 (cutoff = 0.023) PET−/CSF+      PET+/CSF− | −−− −−− +−− −−− −−− −−− +−+ +++ +−+ +++ +++ +++ +++ +++ | 0.0231b 0.0293 0.0263 0.0290 0.0592 0.0250b 0.0125 0.0224b 0.0220b 0.0208b 0.0139 0.0211b 0.0222b 0.0220b |
| tTau/Aβ42 (cutoff = 0.28) PET−/CSF+     PET+/CSF− | −−− −−− +−− −−− −−− +−+ +++ +++ +−+ +++ +++ +++ +++ +++ | 0.289b 0.371 0.323 0.349 0.679 0.157 0.255b 0.275b 0.263b 0.222 0.156 0.235 0.267b 0.260b |
| Aβ42/Aβ40 (cutoff = 0.052) PET−/CSF+         PET+/CSF− | −−− −−− −−+ +−− −−− −−− +−− −−− −−− +−+ +++ | 0.0446 0.0281 0.0505b 0.0458 0.0428 0.0442 0.0499b 0.0323 0.0433 0.0583 0.0586 |
| Aβ42,ng/L (cutoff = 1,030 ng/L) PET−/CSF+                  PET+/CSF− | −−− −−− −−− −−− −−− −−− −−+ +−− −−− −−− −−+ −−− −−− −−− +−− −−− −−− −−− +++ | 810 704 821 706 906 991b 591 882 943b 752 931b 800 916 975b 856 465 730 780 1,235 |

+, positive; –, negative; Aβ40, β-amyloid(1–40); Aβ42, β-amyloid(1–42); CSF, cerebrospinal fluid; PET, positron emission tomography; pTau, phosphorylated tau; tTau, total tau. aThe amyloid PET visual read outcome was determined as the majority vote from three independent readers. bCSF biomarker values close to the cutoff (±10%).

**Supplementary Table 3:** Regression coefficients for pTau, tTau, Aβ42 and Aβ40 after freezing and storage at –20°C for 1 to 13 weeks.

|  | | **Estimate** | **95% CI** | **Pearson’s correlation coefficient (R)** |
| --- | --- | --- | --- | --- |
| pTau | Intercept Slope %Bias at 27 ng/L | 0.42 0.973 –1.15 | –0.375, 1.16 0.926, 1.02 –3.94, 0.62 | 0.996 |
| tTau | Intercept Slope %Bias at 300 ng/L | 2.20 0.965 –2.74 | –2.25, 8.55 0.941, 0.994 –3.42, –1.17 | 0.995 |
| Aβ42 | Intercept Slope %Bias at 1,030 ng/L | –27.5 1.000 –2.64 | –94.0, 6.52 0.954, 1.04 –6.08, –1.11 | 0.995 |
| Aβ40 | Intercept Slope %Bias at 18,520 ng/L | –1,250 1.050 –1.6 | –3,760, 75.1 0.966, 1.17 –5.6, 0.4 | 0.982 |

Aβ40, β-amyloid (1–40); Aβ42, β-amyloid(1–42); CI, confidence interval; pTau, phosphorylated tau; tTau, total tau.
